# Supplementary material for: Graphene oxide liquid crystals for reflective displays without polarizing optics
Source: Royal Society of Chemistry journal article supplement (doi:10.1039/c4nr06008c), 2014-12-08
Supplement: c4nr06008c1.pdf [file c4nr06008c1.pdf]

## Graphene oxide liquid crystals for reflective display without polarizing optics

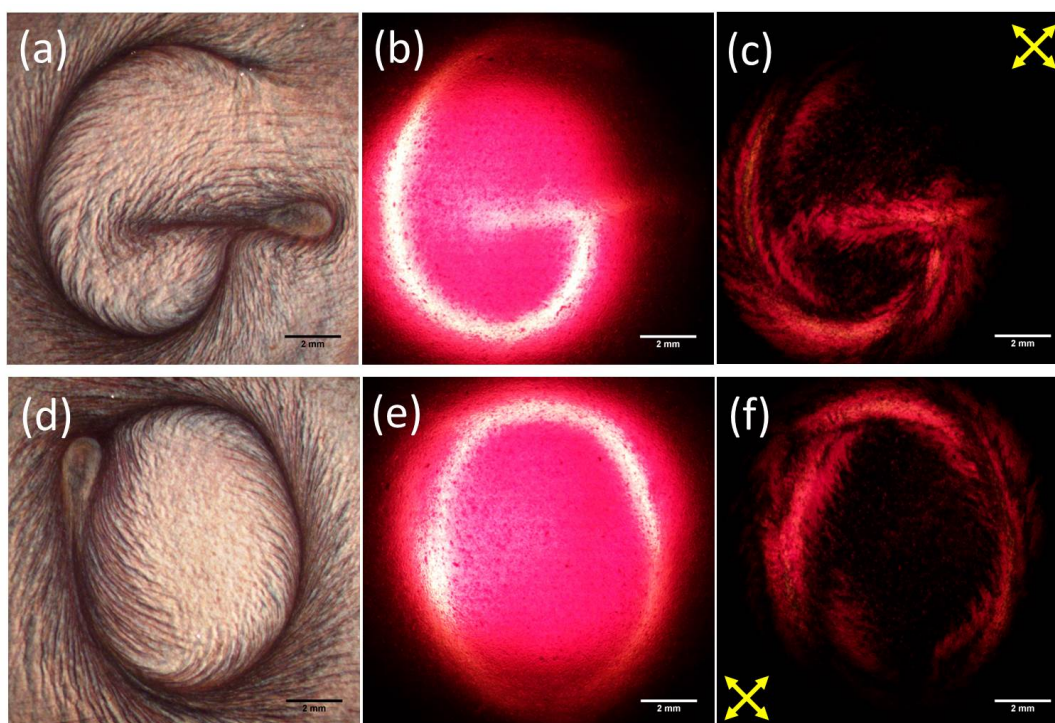

**Figure S1.** Images of the letters “G” and “O” in (a, d) reflection and (b, e) transmission with unpolarized light; and in (c, f) transmission between two cross-polarizers.

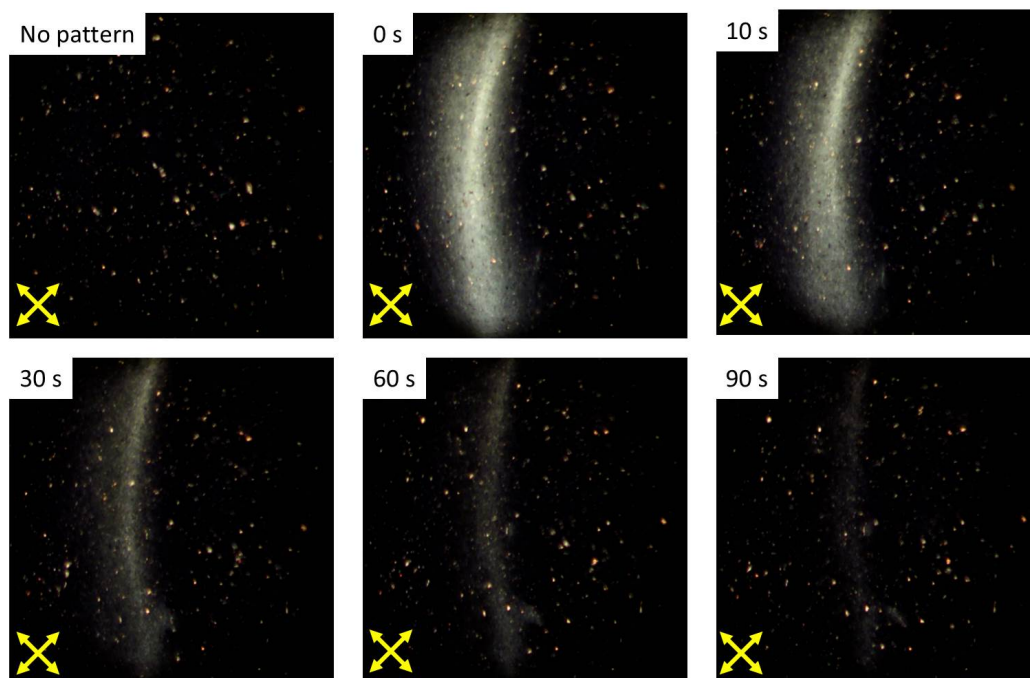

**Figure S2.** Time evolution of a manually drawn line in graphene oxide solution. Concentration: 0.01 wt%.

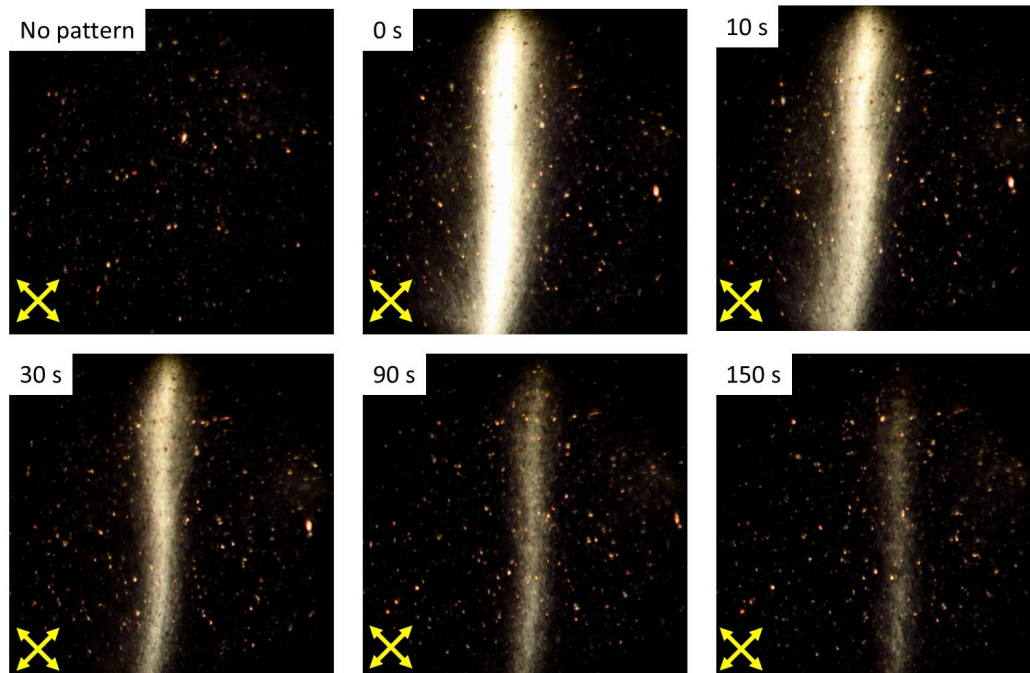

**Figure S3.** Time evolution of a manually drawn line in graphene oxide solution. Concentration: 0.02 wt%.

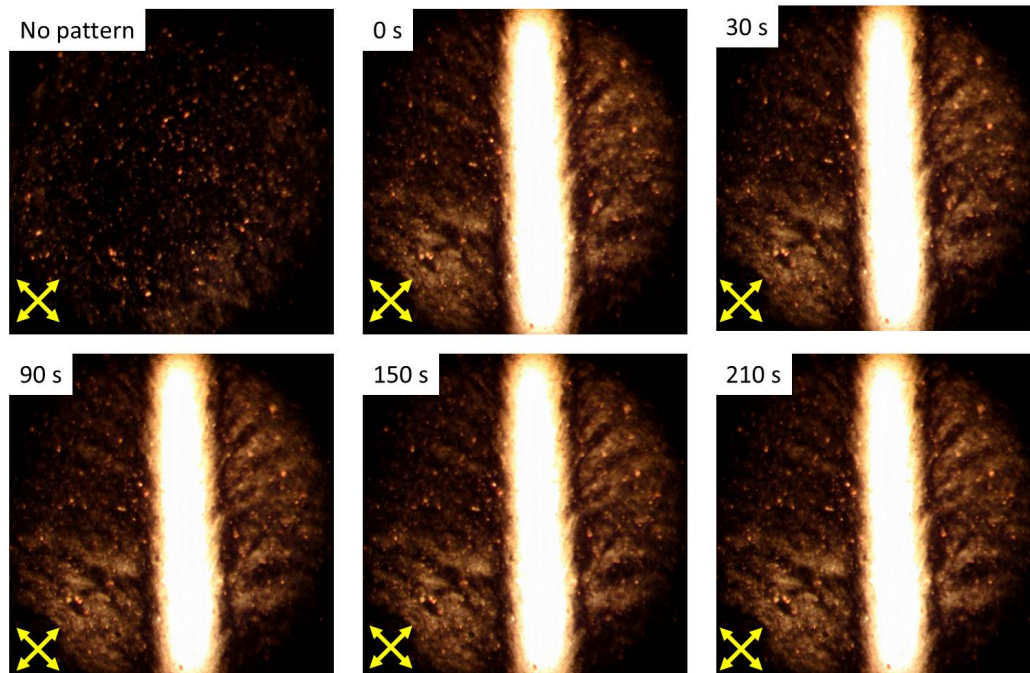

**Figure S4.** Time evolution of a manually drawn line in graphene oxide solution. Concentration: 0.05 wt%.
